# **Clinical characteristics of 101 non-surviving hospitalized patients with COVID-19—A single center, retrospective study**

Qiao Shi<sup>1</sup>, Kai-Liang Zhao<sup>1</sup>, Jia Yu<sup>1</sup>, Jia-Rui Feng<sup>1</sup>, Kai-Ping Zhao<sup>2</sup>, Xiao-Yi Zhang<sup>3</sup>, Xiao-Yan  
Chen<sup>1</sup>, Peng Hu<sup>4</sup>, Yu-Pu Hong<sup>1</sup>, Man Li<sup>1</sup>, Fang Liu<sup>5</sup>, Chen Chen<sup>1</sup>, Wei-Xing Wang<sup>1</sup>

<sup>1</sup>Department of General Surgery, Renmin Hospital of Wuhan University, Wuhan, China

<sup>2</sup>Department of Medical Record Management and Statistics, Beijing Jishuitan Hospital, Beijing,  
China

<sup>3</sup>Department of Critical Care Medicine, Zhongnan Hospital of Wuhan University, Wuhan, China

<sup>4</sup>Department of Emergency, Renmin Hospital of Wuhan University, Wuhan, China

<sup>5</sup>Department of Radiology, Renmin Hospital of Wuhan University, Wuhan, China

Q Shi, KL Zhao and J Yu contributed equally to this article.

Correspondence to: WX Wang, [sate.llite@163.com](mailto:sate.llite@163.com) and C Chen, [appreciation@whu.edu.cn](mailto:appreciation@whu.edu.cn)

Dr. Weixing Wang serves as the corresponding author to communicate with editors.

Weixing Wang, MD

Department of General Surgery,

Renmin Hospital of Wuhan University,

238 Jiefang Road, Wuchang District

Wuhan 430060, China.

Phone: +86 13907141893

E-mail: [sate.llite@163.com](mailto:sate.llite@163.com)

## **WHAT IS ALREADY KNOWN ON THIS TOPIC**

COVID-19 have deprived thousands of lives and caused global concerns. As of March 4, 2020, a total of 80420 COVID-19 cases in China have been confirmed and over 2900 lost their life. We searched PubMed for articles published up to Mar 4, 2020, using the keywords “2019 novel coronavirus”, “2019-nCoV”, “COVID-19”, or “SARS-CoV-2”. We identified that none study focused on the demographic, clinical characteristics and induced-death factors of non-survivors with COVID-19.

## **WHAT THIS STUDY ADDS**

The median age of the 101 died patients with confirmed COVID-19 were 71 years (IQR, 59-80). Of 101 died patients, 82 (81.19%) had 1 or more comorbidities including 59 (58.42%) hypertension and 22 (21.78%) diabetes etc. 100 (99.01%) suffered respiratory failure, 53 (52.48%) developed acute myocardial injury, acute kidney and liver injury occurred in 23 (22.77%) and 18 (17.82%) patients, respectively. This indicated that older patients (>70 years) with comorbidities had a steeply increased risk of death when they suffered COVID-19. Besides respiratory failure, acute cardiac and kidney damage or failure, secondary to COVID-19, played a crucial role in causing death of patients.

## **ABSTRACT**

### **OBJECTIVE**

To study the clinical characteristics of non-surviving hospitalized patients with confirmed COVID-19 in Wuhan, China, and tracked the causes of the death.

### **DESIGN**

Retrospective case series.

### **SETTING**

Two campus of Renmin Hospital of Wuhan University in Wuhan, China, and is responsible for the treatments for COVID-19 assigned by the government.

### **PARTICIPANTS**

101 non-surviving hospitalized patients with confirmed COVID-19. Data were collected from 1 January 2020 to 15 February 2020.

### **MAIN OUTCOME MEASURES**

Clinical data were collected using a standardized case report form. If information was not clear, the investigators in Wuhan contacted the doctor responsible for treating the patients or family members of non-survivors for clarification.

### **RESULTS**

Of 121 died patients with confirmed COVID-19, 101 cases with relatively complete medical records were included. The median age of the 101 non-survivors were 71 years (IQR, 59-80), 60 (59.41%) were men. 82 (81.19%) had fever, 82 (81.19%) had 1 or more comorbidities including hypertension (59 [58.42%]) and diabetes (22 [21.78%]) etc. The median course from hospitalization to death was 4d (IQR, 2-7d). Of 101 died patients, 100 (99.01%) suffered respiratory failure, 53 (52.48%) developed acute myocardial injury, acute kidney and liver injury occurred in 23

(22.77%) and 18 (17.82%) patients, respectively. Chest computed tomographic scans of non-survivors showed vast and fused ground-glass shadows. Compared to patients who survived 3 days, no statistical difference was noticed on lung severity score (11.91 vs 12.07) in patients who died within 3 days. Furthermore, significant elevated laboratory indicators including hypersensitive troponin (1.98 vs 0.2ng/ml), blood urea nitrogen (15.20 vs 10.08mmol/l), neutrophil count ( $11.23$  vs  $6.48 \times 10^9/L$ ), procalcitonin (2.26 vs 0.58ng/ml) and lactic acid (3.80 vs 2.62 mmol/l) etc. were noted in patients who died with 3 days while PaO<sub>2</sub> (54.75 vs 67.45mmHg), CD3% (51.57 vs 60.43%) and CD8% (16.42 vs 23.42%) were significantly depressed.

## CONCLUSION

Older patients (>70 years) with comorbidities had a steeply increased risk of death when they suffered COVID-19. Besides respiratory failure, acute cardiac and kidney damage or failure, secondary to COVID-19, played a crucial role in causing death of patients.

## Introduction

Since December 2019, the outbreak of corona virus disease-19 (COVID-19) which swept across China and emerged in many other countries have caused global concerns [1]. As of March 4, 2020, a total of 80420 COVID-19 cases in China have been confirmed and over 2900 lost their life. In the early stages of this COVID-19, respiratory infection symptoms occurred, with some patients rapidly developed acute respiratory distress syndrome (ARDS), acute respiratory failure and even death. Compared with Severe Acute Respiratory Syndrome (SARS) and Middle East Respiratory Syndrome (MERS), the concealed onset, similar or stronger contagion and lower mortality could be defined as the clinical features of the disease [2-4]. However, many patients suffered a death attack in the early stages of the outbreak in Wuhan City, China.

Previous studies concentrated to show the epidemiological findings, clinical characteristics, and clinical outcome of patient with COVID-19 involved in mild and severe cases [5-6]. But those infected by severe acute respiratory syndrome coronavirus 2 (SARS-CoV-2) are vulnerable to suffer severe attack or death, the causes that lead to the occurrence of rapid death are necessary to be addressed further.

Information regarding clinical features of death caused by COVID-19 has not been reported yet. We aimed to describe the demographic, clinical, laboratory, radiological characteristics and outcomes of non-surviving hospitalized patients confirmed with SARS-CoV-2 infection, and to analyze the possible risk factors that lead to death of SARS-CoV-2 infected patients. In this study, we investigated the characteristics of non-surviving patients with confirmed SARS-CoV-2 infection admitted to Renmin Hospital of Wuhan University (including Shouyi campus and Eastern campus) before February 15, 2020. We hope that this study will provide some important information regarding to death of SARS-CoV-2 infected patients.

## **Methods**

### **Study Design and Participants**

All died patients with confirmed COVID-19 admitted to Renmin Hospital of Wuhan University (including Shouyi campus and Eastern campus) from January 1 to February 15, 2020 in Wuhan, China, were enrolled. Renmin Hospital of Wuhan University is one of the major tertiary teaching hospitals and is responsible for the treatments for COVID-19 assigned by the government. All patients with COVID-19 enrolled in this study were diagnosed according to World Health Organization interim guidance [7]. To analyze the reasons accounted for patients died in a short time after admission, we compared demographic, clinical, laboratory and radiological characteristics between patients died within 3 days of admission with those who survived 3 days.

### **Procedures**

We obtained epidemiological, demographic, clinical, laboratory, and outcome data from electronic medical records, nursing records, laboratory tests, and radiological examinations. Missing data were collected and clarified through direct communication with involved health-care providers or family member of patients. All data were checked by two sophisticated physicians.

We collected data on age, sex, chronic medical conditions (hypertension, cardiovascular disease, chronic pulmonary disease, cerebrovascular disease, chronic kidney disease, diabetes, malignancy), symptoms from onset to hospital admission including fever, dry cough, expectorant, dyspnea, fatigue, anorexia, abdominal pain, headache, nausea and vomiting etc., laboratory parameters on admission, chest computed tomographic (CT) scans, and treatment measures (antiviral therapy, antibacterial therapy, corticosteroid therapy, respiratory support, kidney replacement therapy etc.). The date of disease onset was defined as the day when the onset symptoms were noticed. Acute respiratory distress syndrome (ARDS) and acute

respiratory failure were defined according to the Berlin definition and previous reported [8,9]. Acute kidney injury (AKI) was identified based on serum creatinine [10]. Acute liver injury was identified according to previous report [11]. Acute cardiac injury was defined if the serum hypersensitive troponin I were above the 99th percentile upper reference limit [5]. All these indicators were measured in Renmin Hospital of Wuhan University.

## **Outcomes**

The primary outcome was organ damage or failure (including lung, heart, kidney and liver etc.) from admission to death and analyzed the risk factors of death. Secondary outcomes were to present epidemiological data, demographics, comorbidity, signs and symptoms on admission, laboratory indicators, CT findings and treatment, and compare the differences of patients died within 3d of admission and those survived 3d.

## **Statistical analysis**

We expressed descriptive data as mean (SD) or median (IQR) for continuous variables and number (%) for categorical variables. We tested the distributions of variables for normality with Kolmogorov-Smirnov test. Means of continuous variables were compared using independent group t tests if the data were normally distributed; otherwise Mann-Whitney test was used. Proportions for categorical variables were compared using the  $\chi$  test. All statistical analyses were performed using SPSS version 22.0 software (SPSS Inc).  $P < 0.05$  was considered statistically significant.

## **Results**

### **Epidemiological, demographic and clinical characteristics**

By February 15, 2020, 121 hospitalized patients with confirmed COVID-19 had died in Renmin Hospital of Wuhan University (including Shouyi campus and Eastern campus), of whom 20 cases were excluded due to incomplete medical record. 101 cases were finally included in this study. 60 (59.41%) were males. The median age

was 71 years (IQR, 59-80; range, 35-100 years). From the age distribution, the results showed that there were 56.44% cases (57/101) whose age over 70 years (31 cases in 70-79y; 20 cases in 80-89y; and 6 cases in more than 90y). The median duration from hospital admission to death was 4 days (IQR, 2-7d). The most common symptoms were fever (82 cases [81.19%]), dyspnea (59 cases [58.42%]), dry cough (56 cases [55.45%]), fatigue (36 cases [35.64%]), expectoration (21 cases [20.79%]) and diarrhea (10 cases [9.90%]). Other less common symptoms were anorexia, myalgia, abdominal pain and distension, headache, nausea and vomiting, pharyngalgia, haematemesis and melena, hemoptysis. (**Table 1**)

Of the 101 patients, 82 (81.19%) had at least one comorbidity including hypertension (59 cases [58.42%]), cardiovascular disease (24 cases [23.76%]), diabetes (22 cases [21.78%]), chronic pulmonary disease (14 cases [13.86%]), cerebrovascular disease (13 cases [12.87%]), chronic kidney disease (11 cases [10.89%]) and malignancy (7 cases [6.93%]). (**Table 2**)

Regarding to organ functions, 100 patients (99.01%) developed acute respiratory failure, 53 (52.48%) had acute cardiac injury, acute kidney injury were developed in 23 cases (22.77%), acute liver dysfunction were found in 18 cases (17.82%) and 14 (13.86%) suffered coagulation disorders among which one patient was died of massive upper gastrointestinal bleeding. (**Table 2**)

Then we compared the demographic characteristics, presenting characteristics, and vital signs at presentation between patients died within 3 days of admission and after 3 days of admission. 48 cases (47.52%) died within 3 days of admission, median age was 72 years (IQR, 59-78; range, 30-94 years), 28 (58.33%) were males. 53 cases (52.48%) died after 3 days, median age was 71 years (IQR, 59-81; range, 31-100 years), 32 (60.38%) were males.

Compared with patients who survived 3 days, patients who died within 3 days



exhibited significantly higher respiration rate (25 *vs* 20) and heart rate (97 *vs* 84) at presentation. There were no significant differences of self-report symptoms between two groups including fever, dyspnea, cough, fatigue etc. (**Table 1**)

### **Laboratory findings**

There were quite a lot differences of laboratory parameters between patients who died within 3 days of admission and those survived 3 days. Those died within 3 days of admission had significantly higher white blood cell count ( $12.36 \times 10^9$  *vs*  $7.72 \times 10^9$ /L), neutrophil count ( $11.23 \times 10^9$  *vs*  $6.48 \times 10^9$ /L) and lower eosinophils count ( $0.009 \times 10^9$  *vs*  $0.028 \times 10^9$ /L). Compared with patients who survived 3 days of admission, patients died within 3 days presented with significantly higher percentage of neutrophils (88.86% *vs* 81.95%) but significantly lower percentages of lymphocytes (7.18% *vs* 10.94%), monocytes (3.8% *vs* 6.56%) and eosinophils (0.06% *vs* 0.34%). For other biochemical indexes, procalcitonin (2.26 *vs* 0.58 ng/ml), hsTnI (1.98 *vs* 0.2 ng/ml), Creatine kinase-MB (6.14 *vs* 2.78 ng/ml), myoglobin (437.7 *vs* 216.8 ug/L) and blood urea nitrogen (15.2 *vs* 10.08 mmol/L) were over normal range and significantly higher in patients died within 3 days of admission. (**Table 3**)

Blood gas analyses showed patients died within 3 days presented with significantly lower oxygen saturation (80.58% *vs* 88.37%), higher lactate level (3.80 *vs* 2.62 mmol/L) and lower pH value (7.40 *vs* 7.42) compared with those survived 3 days. Although patients died within 3 days of admission had higher PaCO<sub>2</sub> (38.97 *vs* 35.44 mmHg) and lower PaO<sub>2</sub> (54.75 *vs* 67.45 mmHg), but there were no significant differences between two groups (**Table 4**). Cellular and humoral immunity analysis also revealed several differences between patients died within and over 3 days including percentage of CD3<sup>+</sup> cells and CD8<sup>+</sup> cells, concentrations of IgE antibody and C3 complement. Although only percentage of CD3<sup>+</sup> cells in patients died within 3 days was below normal range, the percentage of CD3<sup>+</sup> cells (51.57% *vs* 60.43%) and CD8<sup>+</sup> cells (16.42% *vs* 23.42%) were significantly lower in patients died within 3

days of admission compared with those survived 3 days. Patients died within 3 days of admission had significantly higher level of IgE antibody over normal range compared with those survived 3 days (157.3 vs 86.44 IU/ml). Level of C3 complement was within normal range in both groups with a significantly higher titration in patients died within 3 days compared with those survived 3 days (1.03 vs 0.89g/L). Other immune parameters did not show significant differences between patients died within 3 days of admission and over 3 days. (**Table 5**)

### **Radiographic changes**

Chest CT scans were used to evaluate the features of lung injury. Only 38 cases had chest CT image in our medical system (11 cases in within 3 days subgroup and 27 cases in over 3 days subgroup). Patients suffered severe lung damage and their lung imaging features presented the vast or merged glass shadow, but quantitation of lung lobe injury and injury score revealed no significant difference between the two subgroups. (**Table 4 and Figure 1**)

### **Treatment**

Among treatment strategies, 97 (96.04%) patients received antiviral therapy, 99 (98.02%) received antibacterial therapy, 44 (43.56%) received glucocorticoid therapy, 36 (35.64%) received gamma globulin inhalation, 78 (77.23%) received high flow oxygen inhalation, 41(40.59%) received noninvasive ventilation, 14 (13.86%) received invasive mechanical ventilation and 5 (4.95%) received continuous renal replacement therapy . Patients who died within 3days and who survived 3days of admission received above treatment were showed in detail in **Table 6**. Among all treatments, except for noninvasive ventilation, no significant difference was noted between two groups.

### **Discussions**

This report, to our knowledge, is the largest case series to analyze died patients with COVID-19 in hospital. As of February 15, 2020, 101 patients died because of

COVID-19 were included in this study. We aim to present the clinical features, organ dysfunction, laboratory indicators of the 101 non-survivors, and analyze possible causes accounted for the rapid progress of disease and death. In the early outbreak of COVID-19, major gaps in our knowledge of the epidemiology, clinical features and treatment measures of COVID-19 posed huge challenge for our clinical practice. Although previous study reported the mortality of patients with COVID-19 is 1.4% [12], some special population including the aged and individuals with underlying comorbidities may be vulnerable to SARS-CoV-2 infection. In our cohort, the median age of non-survivor was 71 years, 81.19% of them combined with one or more underlying medical conditions including hypertension, cardiovascular disease, diabetes, chronic pulmonary disease, cerebrovascular disease, chronic kidney disease and malignancy. This study suggested that patients aged over 70 years with chronic medical conditions were more likely to suffer a severe attack and death.

Common symptoms at onset of COVID-19 were fever, dry cough, myalgia, fatigue etc. [5, 13]. In our cohort, we observed that, besides fever and cough, dyspnea (58.42%) presented early in most non-survivors with confirmed COVID-19, similar finding has also been observed in critically ill patients reported by Yang etc. [14]. In these non-survivors, featured complications during hospitalization including ARDS and respiratory failure, acute cardiac injury (ACI), AKI, acute liver injury (ALI) and abnormal coagulation. In terms of SARS, severe respiratory failure was the leading cause of mortality, with little other organ failure [15]. It is surprised that we observed 52.48% and 22.77% non-survivors suffered heart failure and AKI, respectively. Angiotensin-converting enzyme 2 (ACE2), a crucial SARS-CoV-2 receptor, distributed widely in heart, kidney and intestine etc. [16-18]. Whether SARS-CoV-2 attack heart and kidney or other vital organs directly need to be confirmed further.

The most common laboratory abnormalities observed in this study were elevated white blood cell count, neutrophil count, C-reactive protein, high sensitivity troponin, blood urea nitrogen and decreased lymphocytes percentage etc. (**Table 3, 5**).

Compared with those died after 3 days of admission, non-survivors died within 3 days had numerous different findings including depressed percentages of lymphocyte, CD3<sup>+</sup> and CD8<sup>+</sup> cells, and elevated white blood cell count, high sensitivity troponin and urea nitrogen etc. These evidences suggest that SARS-CoV-2 infection may be associated with cellular immune deficiency, acute myocardial injury and kidney injury etc. These results also support the described organ failure above. In addition, the characteristic chest CT imaging of these non-survivors were evaluated by previous described method <sup>[19]</sup>. The CT features demonstrated extensive infection and severe damage, regarded as “white lung”, in five lobes, but no significant difference was found between the two groups. These characteristics combined with above repented organ failure, laboratory abnormalities suggested that early organ dysfunction or failure were responsible for rapid progression of disease and death of the patients.

Up to now, no antiviral treatment has been recommended for coronavirus treatment except supportive care and organ support <sup>[5, 20]</sup>. In current clinical practice, arbidol was used as an antiviral treatment for SARS-CoV-2 infected patients, but the curative effect remains unclear. Other antiviral medications including remdesivir and lopinavir etc. are still being verified in clinical trials. Furthermore, use of intravenous immunoglobulin is recommended to enhance the ability of anti-infection for severely ill patients and steroids are recommended for patients with ARDS, for as short duration of treatment as possible <sup>[21]</sup>. In this study, 96.04% patients received antiviral therapy, 98.02% received antibacterial therapy. Use of glucocorticoid mainly depended on the severity of inflammatory response. In the early outbreak of COVID-19, all the non-survivors received oxygen inhalation therapy including high flow oxygen inhalation (77.23%), but quite a low proportion of patients received machine ventilation partly due to limited medical resources against the steeply increasing number of patients.

### **Limitations of this study**

Several limitations existed in this study. Firstly, nearly two thirds of these

non-survivors had no chest CT data in our medical system (because most of these patients were transferred from other hospitals without electronic version of imaging data) and evaluation of these imaging features partly depended on the experience of clinicians and radiologists. Secondly, incomplete medical information of some non-survivors may lead to the occurrence of bias. Thirdly, patients died within a short time after admission is unfavorable to track risk factors for this poor outcome. Finally, in the early outbreak of COVID-19, relatively inadequate medical resources may affect the observation of the natural course of disease.

## **Conclusion**

The findings of our study suggested that older patients (>70 years) with comorbidities are at higher risks for poor outcomes. Besides respiratory failure, acute heart injury and kidney injury, secondary to COVID-19, played a crucial role in causing death of patients.

**Contributors:** WXW conceptualised the paper. QS and CC drafted the manuscript. QS, KLZ, JY, JRF, XYZ, XYC, PH, YPH and ML collected the epidemiological and clinical data. KLZ and KPZ contributed to the statistical analysis. JY and FL contributed to radiological analysis. CC and WW conceived and supervised the overall study. All authors reviewed and approved the final version of the manuscript.

**Funding:** This study was partly funded by National Natural Science Foundation of China (No.81800574; No.81870442; No.81700567).

**Competing interests:** All authors have completed the ICMJE uniform disclosure form. No support from any organization for the submitted work; no financial relationships with any organizations that might have an interest in the submitted work in the previous three years; no other relationships or activities that could appear to have influenced the submitted work.

**Ethical approval:** This study was approved by the Ethics Committee of Renmin Hospital of Wuhan University (No. WDRY2020-K059).

**Declaration of interests**

All authors declared no conflict of interest.

**Patient consent:** waived.

**Data sharing:** No additional data available.

**Transparency:** The manuscript's supervisors affirm that the manuscript is an honest, accurate, and transparent account of the study being reported; that no important aspects of the study have been omitted; and that any discrepancies from the study as planned have been explained.

## References

1. Wang C, Horby PW, Hayden FG, et al. A novel coronavirus outbreak of global health concern. *The Lancet* 2020;395:470-73.
2. Chang D, Lin M, Wei L, et al. Epidemiologic and clinical characteristics of novel coronavirus infections involving 13 patients outside Wuhan, China. *Jama* 2020; published online 7 February. doi.org/10.1001/jama.2020.1623.
3. WHO. Middle East respiratory syndrome coronavirus (MERS-CoV). <http://www.who.int/emergencies/mers-cov/en/>. (accessed Feb 25, 2020)
4. WHO. Novel coronavirus—China. <http://www.who.int/csr/don/12-january-2020-novel-coronavirus-china/en/>. (accessed Feb 25, 2020)
5. Wang D, Hu B, Hu C, et al. Clinical characteristics of 138 hospitalized patients with 2019 novel coronavirus–infected pneumonia in Wuhan, China. *Jama* 2020; published online 7 February. doi.org/10.1001/jama.2020.1585
6. Chan JF-W, Yuan S, Kok K-H, et al. A familial cluster of pneumonia associated with the 2019 novel coronavirus indicating person-to-person transmission: a study of a family cluster. *The Lancet* 2020;395:514-23
7. WHO. Clinical management of severe acute respiratory infection when novel coronavirus (nCoV) infection is suspected. [https://www.who.int/publications-detail/linical-management-ofsevere-acute-respiratory-infection-when-novel-coronavirus-\(ncov\)-infection-is-suspected](https://www.who.int/publications-detail/linical-management-ofsevere-acute-respiratory-infection-when-novel-coronavirus-(ncov)-infection-is-suspected) (accessed Feb 25, 2020)
8. Azoulay E, Mokart D, Kouatchet A, et al. Acute respiratory failure in immunocompromised adults. *The Lancet Respiratory Medicine* 2019;7:173-86
9. Definition Task Force A, Ranieri V, Rubenfeld G, et al. Acute respiratory distress syndrome: the Berlin Definition. *Jama* 2012;307:2526-33
10. Khwaja A. KDIGO clinical practice guidelines for acute kidney injury. *Nephron Clin Pract* 2012;120:c179-c84
11. Koch DG, Speiser J, Durkalski V, et al. The natural history of severe acute liver injury. *The American journal of gastroenterology* 2017;112:1389

12. Guan W-j, Ni Z-y, Hu Y, et al. Clinical characteristics of 2019 novel coronavirus infection in China. *N Engl J Med* 2020; medRxiv Feb 9. doi.org/10.1101/2020.02.06.20020974
13. Zhu N, Zhang D, Wang W, et al. A novel coronavirus from patients with pneumonia in China, 2019. *N Engl J Med* 2020;382:727-33
14. Yang X, Yu Y, Xu J, et al. Clinical course and outcomes of critically ill patients with SARS-CoV-2 pneumonia in Wuhan, China: a single-centered, retrospective, observational study. *Lancet Respir Med* 2020; published online 24 February. doi.org/10.1016/S2213-2600(20)30079-5
15. Gomersall CD, Joynt GM, Lam P, et al. Short-term outcome of critically ill patients with severe acute respiratory syndrome. *Intensive Care Med* 2004;30:381-87
16. Santos RAS, Sampaio WO, Alzamora AC, et al. The ACE2/angiotensin-(1-7)/MAS axis of the renin-angiotensin system: focus on angiotensin-(1-7). *Physiological reviews* 2018;98:505-53
17. Hashimoto T, Perlot T, Rehman A, et al. ACE2 links amino acid malnutrition to microbial ecology and intestinal inflammation. *Nature* 2012;487:477-81
18. Lu R, Zhao X, Li J, et al. Genomic characterisation and epidemiology of 2019 novel coronavirus: implications for virus origins and receptor binding. *The Lancet* 2020;395:565-74
19. Chung M, Bernheim A, Mei X, et al. CT imaging features of 2019 novel coronavirus (2019-nCoV). *Radiology* 2020; published online 4 February. doi.org/10.1148/radiol.2020200230
20. de Wit E, van Doremalen N, Falzarano D, et al. SARS and MERS: recent insights into emerging coronaviruses. *Nature Reviews Microbiology* 2016;14:523
21. Chen N, Zhou M, Dong X, et al. Epidemiological and clinical characteristics of 99 cases of 2019 novel coronavirus pneumonia in Wuhan, China: a descriptive study. *The Lancet* 2020;395:507-13. doi: 10.1016/S0140-6736(20)30211-7



**Table 1. Demographics and Baseline Characteristics of the Non-survivors**

|                                           | Total (N=101) | ≤3d Course of<br>Disease Group (N=48) | >3d Course of<br>Disease Group (N=53) | P Value <sup>#</sup> |
|-------------------------------------------|---------------|---------------------------------------|---------------------------------------|----------------------|
| <b>Sex</b>                                |               |                                       |                                       |                      |
| Male                                      | 60 (59.41%)   | 28 (58.33%)                           | 32 (60.38%)                           | 0.835                |
| Female                                    | 41 (40.59%)   | 20 (41.67%)                           | 21 (39.62%)                           |                      |
| Age, Median (IQR), y                      | 71 (59-80)    | 72 (59-78)                            | 71 (59-81)                            | 0.762                |
| Age Distribution                          |               |                                       |                                       |                      |
| <b>Range</b>                              | 35y-100y      | 30y-94y                               | 31y-100y                              |                      |
| 30-39y                                    | 4 (3.96%)     | 2 (4.17%)                             | 2 (3.77%)                             | 1.000                |
| 40-49y                                    | 3 (2.97%)     | 2 (4.17%)                             | 1 (1.89%)                             | 0.931                |
| 50-59y                                    | 19 (18.81%)   | 8 (16.67%)                            | 11 (20.75%)                           | 0.600                |
| 60-69y                                    | 18 (17.82%)   | 7 (14.58%)                            | 11 (20.75%)                           | 0.418                |
| 70-79y                                    | 31 (30.69%)   | 18 (37.50%)                           | 13 (24.53%)                           | 0.158                |
| 80-89y                                    | 20 (19.80%)   | 9 (18.75%)                            | 11 (20.75%)                           | 0.801                |
| ≥90y                                      | 6 (5.94%)     | 2 (4.17%)                             | 4 (7.55%)                             | 0.767                |
| <b>Course of Disease, Median (IQR), d</b> |               |                                       |                                       |                      |
| From admission to death                   | 4 (2-7)       | 2 (1-3)                               | 7 (5-8)                               | 0.000 <sup>#</sup>   |
| <b>Signs and Symptoms</b>                 |               |                                       |                                       |                      |
| Fever                                     | 82 (81.19%)   | 38 (79.17%)                           | 44 (83.02%)                           | 0.621                |
| Dyspnea                                   | 59 (58.42%)   | 28 (58.33%)                           | 31 (58.49%)                           | 0.987                |
| Dry cough                                 | 56 (55.45%)   | 23 (47.92%)                           | 33 (62.26%)                           | 0.147                |
| Fatigue                                   | 36 (35.64%)   | 19 (39.58%)                           | 17 (32.08%)                           | 0.431                |
| Expectoration                             | 21 (20.79%)   | 8 (16.67%)                            | 13 (24.53%)                           | 0.331                |

|                                             |               |               |               |                     |
|---------------------------------------------|---------------|---------------|---------------|---------------------|
| Diarrhea                                    | 10 (9.90%)    | 4 (8.33%)     | 6 (11.32%)    | 0.616               |
| Anorexia                                    | 7 (6.93%)     | 4 (8.33%)     | 3 (5.66%)     | 0.597               |
| Myalgia                                     | 6 (5.94%)     | 1 (2.08%)     | 5 (9.43%)     | 0.255               |
| Abdominal pain and distension               | 5 (4.95%)     | 3 (6.25%)     | 2 (3.77%)     | 0.909               |
| Headache                                    | 5 (4.95%)     | 1 (2.08%)     | 4 (7.55%)     | 0.421               |
| Nausea and vomit                            | 3 (2.97%)     | 1 (2.08%)     | 2 (3.77%)     | 1.000               |
| Pharyngalgia                                | 3 (2.97%)     | 2 (4.17%)     | 1 (1.89%)     | 0.931               |
| Haematemesis and melena                     | 2 (1.98%)     | 1 (2.08%)     | 1 (1.89%)     | 1.000               |
| Hemoptysis                                  | 2 (1.98%)     | 1 (2.08%)     | 1 (1.89%)     | 1.000               |
| Heart Rate, Median (IQR), bpm               | 88 (78-106)   | 97 (81-112)   | 84 (75-98)    | 0.0168 <sup>#</sup> |
| Respiratory Rate, Median (IQR)              | 21 (19-30)    | 25 (20-36)    | 20 (19-24)    | 0.0029 <sup>#</sup> |
| Mean Systolic Pressure, Median (IQR), mmHg  | 127 (117-143) | 125 (113-145) | 129 (120-142) | 0.5296              |
| Mean Diastolic Pressure, Median (IQR), mmHg | 78 (66-87)    | 76 (65-90)    | 79 (68-86)    | 0.5765              |

<sup>#</sup> *P* values indicate differences between patients died within 3 days of admission and those survived 3 days. *P* < 0.05 was considered statistically significant.  
IQR: Interquartile range.

**Table 2. Main comorbidities and complications**

|                                     | Total (N=101) | ≤3d Course of<br>Disease Group (N=48) | >3d Course of<br>Disease Group (N=53) | P Value <sup>#</sup> |
|-------------------------------------|---------------|---------------------------------------|---------------------------------------|----------------------|
| <b>Number of Main Comorbidities</b> |               |                                       |                                       |                      |
| 0                                   | 19 (18.81%)   | 11 (22.92%)                           | 8 (15.09%)                            | 0.315                |
| 1                                   | 28 (27.72%)   | 15 (31.25%)                           | 13 (24.53%)                           | 0.451                |
| 2                                   | 25 (24.75%)   | 14 (29.17%)                           | 11 (20.75%)                           | 0.328                |
| 3                                   | 15 (14.85%)   | 4 (8.33%)                             | 11 (20.75%)                           | 0.080                |
| 4                                   | 4 (3.96%)     | 2 (4.17%)                             | 2 (3.77%)                             | 1.000                |
| 5                                   | 4 (3.96%)     | 1 (2.08%)                             | 3 (5.66%)                             | 0.682                |
| 6                                   | 6 (5.94%)     | 1 (2.08%)                             | 5 (9.43%)                             | 0.255                |
| <b>Type of Main Comorbidities</b>   |               |                                       |                                       |                      |
| Hypertension                        | 59 (58.42%)   | 26 (54.17%)                           | 33 (62.26%)                           | 0.410                |
| Cardiovascular disease              | 24 (23.76%)   | 9 (18.75%)                            | 15 (28.30%)                           | 0.260                |
| Diabetes                            | 22 (21.78%)   | 9 (18.75%)                            | 13 (24.53%)                           | 0.482                |
| Chronic pulmonary disease           | 14 (13.86%)   | 4 (8.33%)                             | 10 (18.87%)                           | 0.126                |
| Cerebrovascular disease             | 13 (12.87%)   | 4 (8.33%)                             | 9 (16.98%)                            | 0.195                |
| Chronic kidney disease              | 11 (10.89%)   | 2 (4.17%)                             | 9 (16.98%)                            | 0.039 <sup>#</sup>   |
| Malignancy                          | 7 (6.93%)     | 3 (6.25%)                             | 4 (7.55%)                             | 1.000                |
| <b>Complications</b>                |               |                                       |                                       |                      |
| Respiratory failure                 | 100 (99.01%)  | 47 (97.92%)                           | 53 (100%)                             | 0.941                |
| Heart failure                       | 53 (52.48%)   | 28 (58.33%)                           | 25 (47.17%)                           | 0.262                |
| Acute kidney injury                 | 23 (22.77%)   | 12 (25.00%)                           | 11 (20.75%)                           | 0.611                |
| Acute liver injury                  | 18 (17.82%)   | 9 (18.75%)                            | 9 (16.98%)                            | 0.817                |
| Coagulation disorders               | 14 (13.86%)   | 4 (8.33%)                             | 10 (18.87%)                           | 0.126                |

<sup>#</sup> P values indicate differences between patients died within 3 days of admission and those survived 3 days.  $P < 0.05$  was considered statistically significant.

**Table 3. Laboratory Analysis of the Non-survivors**

|                                             | Normal Range           | Total |               | ≤3d Course of Disease Group |               | >3d Course of Disease Group |               | P Value <sup>#</sup>  |
|---------------------------------------------|------------------------|-------|---------------|-----------------------------|---------------|-----------------------------|---------------|-----------------------|
|                                             |                        | N     | Mean±SD       | N                           | Mean±SD       | N                           | Mean±SD       |                       |
| White blood cell count, ×10 <sup>9</sup> /L | 3.5-9.5                | 90    | 9.728 ± 0.658 | 39                          | 12.36 ± 1.25  | 51                          | 7.72 ± 0.51   | 0.0003 <sup>#</sup>   |
| Neutrophil%                                 | 40%-75%                | 90    | 84.95 ± 0.921 | 39                          | 88.86 ± 1.18  | 51                          | 81.95 ± 1.20  | 0.0001 <sup>#</sup>   |
| Lymphocyte%                                 | 20%-50%                | 90    | 9.313 ± 0.708 | 39                          | 7.18 ± 0.90   | 51                          | 10.94 ± 0.99  | 0.0077 <sup>#</sup>   |
| Monocyte%                                   | 3%-10%                 | 90    | 5.364 ± 0.334 | 39                          | 3.80 ± 0.36   | 51                          | 6.56 ± 0.46   | < 0.0001 <sup>#</sup> |
| Eosnophils%                                 | 0.4%-8%                | 90    | 0.237 ± 0.060 | 39                          | 0.06 ± 0.02   | 51                          | 0.34 ± 0.09   | 0.008 <sup>#</sup>    |
| Neutrophil count, ×10 <sup>9</sup> /L       | 1.8-6.3                | 90    | 8.466 ± 0.655 | 39                          | 11.23 ± 1.24  | 51                          | 6.48 ± 0.48   | 0.0002 <sup>#</sup>   |
| Lymphocyte count, ×10 <sup>9</sup> /L       | 1.1-3.2                | 90    | 0.760 ± 0.079 | 39                          | 0.70 ± 0.08   | 51                          | 0.69 ± 0.05   | 0.9127                |
| Monocyte count, ×10 <sup>9</sup> /L         | 0.1-0.6                | 90    | 0.441 ± 0.030 | 39                          | 0.39 ± 0.04   | 51                          | 0.48 ± 0.04   | 0.1384                |
| Eosnophils count, ×10 <sup>9</sup> /L       | 0.02-0.52              | 90    | 0.041 ± 0.022 | 39                          | 0.009 ± 0.003 | 51                          | 0.028 ± 0.007 | 0.014 <sup>#</sup>    |
| Platelet count, ×10 <sup>9</sup> /L         | 125-350                | 89    | 178.2 ± 10.83 | 38                          | 185.2 ± 21.25 | 51                          | 173.0 ± 10.50 | 0.5781                |
| C-reactive protein, mg/L                    | 0.068-8.2              | 74    | 107.9 ± 7.237 | 35                          | 123.4 ± 10.85 | 39                          | 94.10 ± 9.26  | 0.0427 <sup>#</sup>   |
| Procalcitonin, ng/ml                        | <0.1                   | 82    | 1.304±0.397   | 36                          | 2.26 ± 0.87   | 46                          | 0.58 ± 0.13   | 0.0352 <sup>#</sup>   |
| BNP, pg/mL                                  | <75y, 0-125; ≥75y, 0-4 | 77    | 2016 ± 356.0  | 34                          | 2149 ± 493.6  | 43                          | 1912 ± 508.7  | 0.7434                |
| High sensitivity troponin, ng/ml            | 0-0.04                 | 76    | 0.983 ± 0.397 | 33                          | 1.98 ± 0.87   | 43                          | 0.20 ± 0.10   | 0.0237 <sup>#</sup>   |
| Creatine kinase–MB, ng/ml                   | 0-5                    | 74    | 8.912 ± 4.046 | 33                          | 6.14 ± 1.37   | 41                          | 2.78 ± 0.36   | 0.0108 <sup>#</sup>   |
| Myoglobin, ug/L                             | 0-110                  | 76    | 315.8 ± 38.50 | 34                          | 437.7 ± 70.46 | 42                          | 216.8 ± 31.78 | 0.0032 <sup>#</sup>   |
| Alanine aminotransferase, U/L               | 7-40                   | 88    | 55.99 ± 19.20 | 36                          | 88.64 ± 46.39 | 52                          | 34.15 ± 4.140 | 0.1641                |
| Aspartate aminotransferase,U/L              | 13-35                  | 88    | 116.8 ± 67.70 | 36                          | 219.2 ± 165.2 | 52                          | 46.15 ± 4.297 | 0.2108                |
| Albumin, g/L                                | 40-55                  | 88    | 33.14 ± 0.505 | 36                          | 32.32 ± 0.81  | 52                          | 33.75 ± 0.63  | 0.1627                |
| Total bilirubin, mmol/L                     | 0-23                   | 88    | 25.01 ± 6.686 | 36                          | 28.94 ± 11.99 | 52                          | 22.38 ± 7.77  | 0.6321                |
| Blood urea nitrogen, mmol/L                 | 3.1-8.8                | 87    | 11.94 ± 1.086 | 36                          | 15.20 ± 2.37  | 51                          | 10.08 ± 1.01  | 0.03 <sup>#</sup>     |

|                                          |           |    |                   |    |                   |    |                   |        |
|------------------------------------------|-----------|----|-------------------|----|-------------------|----|-------------------|--------|
| Creatinine, $\mu\text{mol/L}$            | 41-81     | 88 | $139.8 \pm 22.83$ | 36 | $172.5 \pm 45.75$ | 52 | $116.5 \pm 21.63$ | 0.2274 |
| Blood glucose, $\text{mmol/L}$           | 3.9-6.1   | 88 | $8.910 \pm 0.704$ | 36 | $8.84 \pm 0.80$   | 52 | $8.99 \pm 1.06$   | 0.9171 |
| Prothrombin time, s                      | 9-13      | 79 | $15.35 \pm 2.043$ | 30 | $18.73 \pm 5.23$  | 49 | $13.22 \pm 0.56$  | 0.1864 |
| Activated partial thromboplastin time, s | 25.1-36.5 | 79 | $34.43 \pm 2.097$ | 30 | $37.96 \pm 5.07$  | 49 | $32.17 \pm 1.21$  | 0.1758 |
| D-dimer, $\text{mg/L}$                   | 0-0.55    | 79 | $15.31 \pm 3.427$ | 30 | $21.28 \pm 7.19$  | 49 | $11.47 \pm 3.30$  | 0.1666 |

<sup>#</sup> *P* values indicate differences between patients died within 3 days of admission and those survived 3 days. *P* < 0.05 was considered statistically significant.

**Table 4. Blood Gas Analysis and lung severity score of the Non-survivors**

| Normal Range             |           | Total |                  | $\leq 3\text{d}$ Course of Disease Group |                  | $> 3\text{d}$ Course of Disease Group |                  | P Value <sup>#</sup> |
|--------------------------|-----------|-------|------------------|------------------------------------------|------------------|---------------------------------------|------------------|----------------------|
|                          |           | N     | Mean $\pm$ SD    | N                                        | Mean $\pm$ SD    | N                                     | Mean $\pm$ SD    |                      |
| pH                       | 7.35-7.45 | 69    | $7.39 \pm 0.01$  | 31                                       | $7.40 \pm 0.02$  | 38                                    | $7.42 \pm 0.01$  | 0.013 <sup>#</sup>   |
| PaO <sub>2</sub> , mmHg  | 80-100    | 70    | $61.64 \pm 3.75$ | 32                                       | $54.75 \pm 4.42$ | 38                                    | $67.45 \pm 5.71$ | 0.092                |
| PaCO <sub>2</sub> , mmHg | 35-45     | 70    | $36.97 \pm 1.24$ | 32                                       | $38.79 \pm 2.21$ | 38                                    | $35.44 \pm 1.30$ | 0.179                |
| Oxyhemoglobin saturation | 95-98     | 74    | $84.89 \pm 1.46$ | 33                                       | $80.58 \pm 2.48$ | 41                                    | $88.37 \pm 1.56$ | 0.007 <sup>#</sup>   |
| Lactate, $\text{mmol/L}$ | 0.5-1.5   | 66    | $3.16 \pm 0.28$  | 30                                       | $3.80 \pm 0.51$  | 36                                    | $2.62 \pm 0.26$  | 0.035 <sup>#</sup>   |
| Lung severity score      | 0-20      | 38    | $12.02 \pm 6.76$ | 11                                       | $11.91 \pm 6.64$ | 27                                    | $12.07 \pm 6.94$ | 0.946                |

<sup>#</sup> *P* values indicate differences between patients died within 3 days of admission and those survived 3 days. *P* < 0.05 was considered statistically significant.

**Table 5. Cellular and Humoral Immunity Analysis of the Non-survivors**

|               | Normal Range | Total |               | ≤3d Course of Disease Group |                | >3d Course of Disease Group |                | P Value <sup>#</sup> |
|---------------|--------------|-------|---------------|-----------------------------|----------------|-----------------------------|----------------|----------------------|
|               |              | N     | Mean±SD       | N                           | Mean±SD        | N                           | Mean±SD        |                      |
| CD3%          | 56%-86%      | 56    | 56.91 ± 1.83  | 22                          | 51.57 ± 3.19   | 34                          | 60.43 ± 2.04   | 0.0171 <sup>#</sup>  |
| CD3           | 723-2737 /ul | 56    | 341.5 ± 29.1  | 22                          | 331.10 ± 49.64 | 34                          | 372.10 ± 38.37 | 0.512                |
| CD4%          | 33%-58%      | 56    | 33.96 ± 1.432 | 22                          | 34.20 ± 2.59   | 34                          | 33.81 ± 1.69   | 0.8937               |
| CD4           | 404-1612 /ul | 56    | 195.6 ± 15.08 | 22                          | 203.30 ± 23.56 | 34                          | 197.9 ± 19.30  | 0.8596               |
| CD8%          | 13%-39%      | 56    | 24.67 ± 4.630 | 22                          | 16.42 ± 1.78   | 34                          | 23.42 ± 1.93   | 0.0152 <sup>#</sup>  |
| CD8           | 220-1129 /ul | 56    | 130.4 ± 16.60 | 22                          | 120.70 ± 30.10 | 34                          | 151.0 ± 22.48  | 0.416                |
| CD19%         | 5%-22%       | 56    | 29.04 ± 9.264 | 22                          | 21.99 ± 2.38   | 34                          | 18.08 ± 1.93   | 0.2079               |
| CD19          | 80-616 /ul   | 56    | 106.0 ± 9.898 | 22                          | 127.7 0± 18.56 | 34                          | 93.40 ± 10.32  | 0.0868               |
| CD16+56%      | 5%-26%       | 56    | 21.71 ± 1.820 | 22                          | 24.04 ± 3.56   | 34                          | 19.33 ± 1.67   | 0.1875               |
| CD16+56       | 84-724 /ul   | 56    | 131.8 ± 21.19 | 22                          | 167.60 ± 50.01 | 34                          | 116.1 ± 13.37  | 0.2398               |
| IgG           | 8-17 g/L     | 51    | 13.06 ± 0.578 | 21                          | 13.50 ± 0.78   | 30                          | 12.75 ± 0.83   | 0.5306               |
| IgM           | 0.4-3.45 g/L | 51    | 0.972± 0.072  | 21                          | 0.88 ± 0.07    | 30                          | 1.036 ± 0.11   | 0.2908               |
| IgA           | 0.76-3.9 g/L | 51    | 2.777 ± 0.182 | 21                          | 2.86 ± 0.25    | 30                          | 2.719 ± 0.269  | 0.7088               |
| IgE           | <100IU/ml    | 51    | 115.6 ± 17.87 | 21                          | 157.30 ± 34.40 | 30                          | 86.44 ± 17.13  | 0.0498 <sup>#</sup>  |
| C3 Complement | 0.81-1.6 g/L | 51    | 0.945± 0.031  | 21                          | 1.03 ± 0.05    | 30                          | 0.89 ± 0.04    | 0.0245 <sup>#</sup>  |
| C4 Complement | 0.1-0.4 g/L  | 51    | 0.266 ± 0.017 | 21                          | 0.29 ± 0.03    | 30                          | 0.25 ± 0.02    | 0.2088               |

<sup>#</sup> P values indicate differences between patients died within 3 days of admission and those survived 3 days.  $P < 0.05$  was considered statistically significant.

**Table 6. Treatment of the Non-survivors**

|                                             | Total (N=101) | ≤3d Course of<br>Disease Group (N=48) | >3d Course of<br>Disease Group (N=53) | P Value <sup>#</sup> |
|---------------------------------------------|---------------|---------------------------------------|---------------------------------------|----------------------|
| Treatment                                   |               |                                       |                                       |                      |
| Antiviral therapy                           | 97 (96.04%)   | 47 (97.92%)                           | 50 (94.34%)                           | 0.357                |
| Antibiotic therapy                          | 99 (98.02%)   | 47 (97.92%)                           | 52 (98.11%)                           | 0.944                |
| Glucocorticoid therapy                      | 44 (43.56%)   | 17 (35.42%)                           | 27 (50.94%)                           | 0.116                |
| Gamma globulin therapy                      | 36 (35.64%)   | 13 (27.08%)                           | 23 (43.40%)                           | 0.087                |
| High flow oxygen inhalation                 | 78 (77.23%)   | 35 (72.92%)                           | 43 (81.13%)                           | 0.326                |
| Noninvasive ventilation                     | 41 (40.59%)   | 11 (22.92%)                           | 30 (56.60%)                           | 0.001 <sup>#</sup>   |
| Invasive mechanical ventilation             | 14 (13.86%)   | 8 (16.67%)                            | 6 (11.32%)                            | 0.437                |
| Continuous Renal Replacement Therapy (CRRT) | 5 (4.95%)     | 2 (4.17%)                             | 3 (5.66%)                             | 1.000                |

<sup>#</sup> *P* values indicate differences between patients died within 3 days of admission and those survived 3 days. *P* < 0.05 was considered statistically significant.

A. Computed tomography images on day 6 after symptom onset. (From  $\leq 3$ d Course of Disease Group)

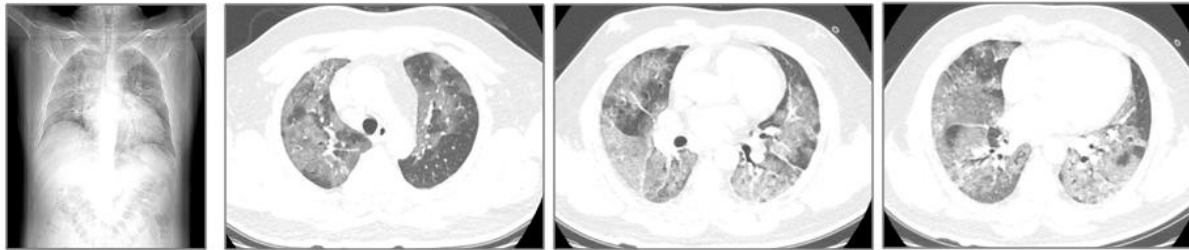

B. Computed tomography images on day 7 after symptom onset. (From  $> 3$ d Course of Disease Group)

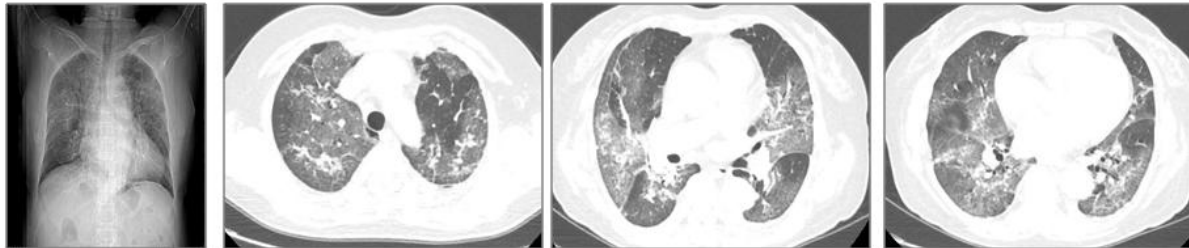

**Figure 1:** chest CT of two patients

The imaging features represented vast and fused ground-glass shadows in the five lobes between two patients (A and B).
